# Supplementary material
Source: PubMed Central journal article supplement (PMC3143625)

## SUPPLEMENTAL DATA

**Fig. S1. The physical association of CINP with NS5B.** *A*, GST pull-down assay to identify the CINP/NS5B (1a and 2a subtype) interaction. 293T cells were grown in 6 cm dishes and transfected with the pCMV/myc-NS5B (genotype 1a from H77) or pCDNA 3.1/myc-His-3×Flag-NS5B (genotype 2a from JFH-1) plasmids. Forty-eight hours later, the cells were harvested as described in the Materials and methods section, and the supernatant was divided into two equal parts and incubated with GST or GST-CINP beads for 2 h. Protein-bound Glutathione-Sepharose 4B beads were washed and boiled for 5 min, and then detected by western blot using anti-myc or anti-Flag antibody. Coomassie-stained GST and GST-CINP are shown. *B*, A schematic diagram of the NS5B deletion mutants used in this study. *C*, Full-length or deleted myc-tagged NS5B was transiently transfected into 293T cells and detected by western blot (left panel). Proteins pulled down by GST-CINP were examined by western blot with an anti-myc antibody (right panel).

**Fig. S2. RNA polymerase activities of the deletion mutants.** The RdRp activities were monitored by *in vitro de novo* transcription assay. Briefly, 0.1 mM purified HCV RdRps were pre-incubated for 30 min at 29°C, and then incubated with 50 mM Tris/HCl (pH 8.0), 200 mM monopotassium glutamate, 3.5 mM MnCl<sub>2</sub>, 1mM DTT, 0.5 mM GTP, 50 mM ATP, 50 mM CTP, 5 mM [ $\alpha$ -<sup>32</sup>P]UTP, 0.02 mM RNA template (SL12-1S) and 100 U/ml human placental RNase inhibitor at 29°C for 90 min. [<sup>32</sup>P]-RNA products (HCV RdRp activity) were resolved by SDS-PAGE (6% gel, 8 M urea) and subjected to autoradiography.

**Fig. S3. NS5B has no effect on CINP protein level.** *A*, CINP expression was compared in Huh7 cells and the HCV subgenomic replicon. *B*, CINP protein level in Huh7.5 cells was examined after mock infection or infection with different MOI (0.1 and 0.5). *C* and *D*, The effect of NS5B on CINP was examined in HepG2 Tet-on NS5B stable cells. (*C*) Different time points after induction by 1  $\mu$ g/ml Dox and (*D*) 48 hours after induction with different Dox concentrations are presented.

Figure. S1

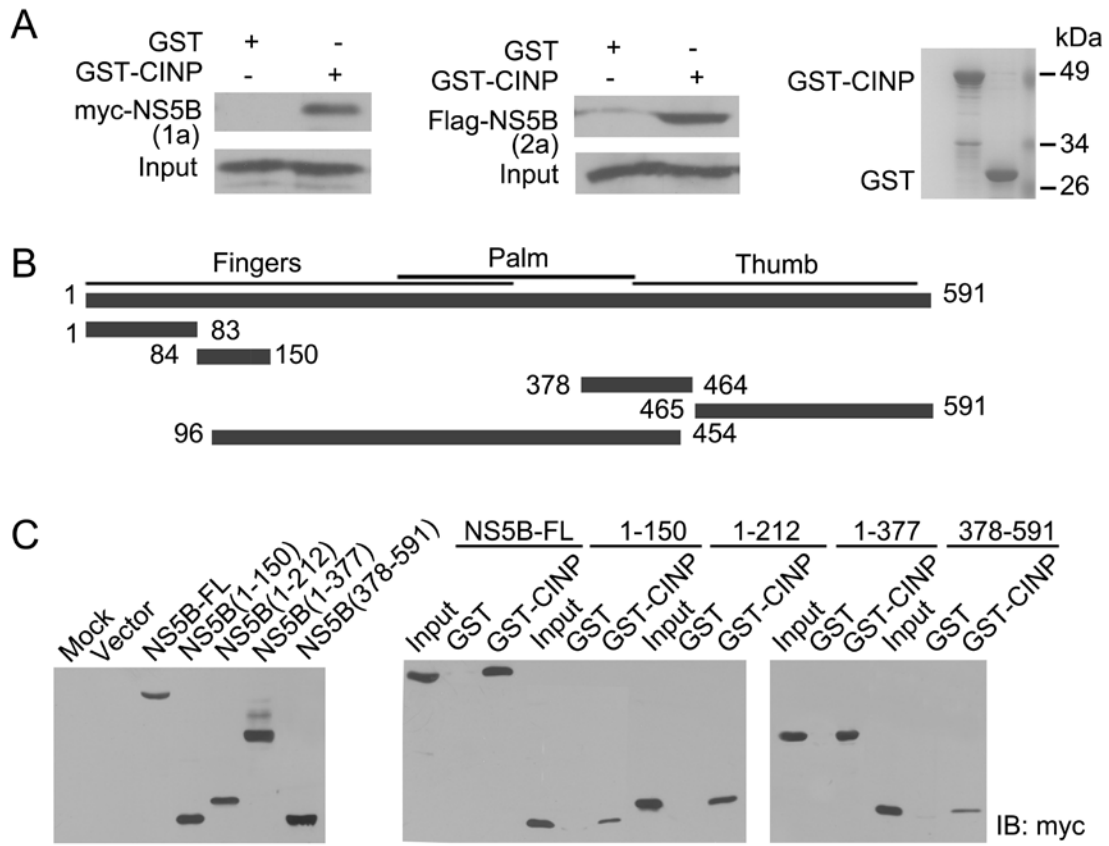

Figure. S2

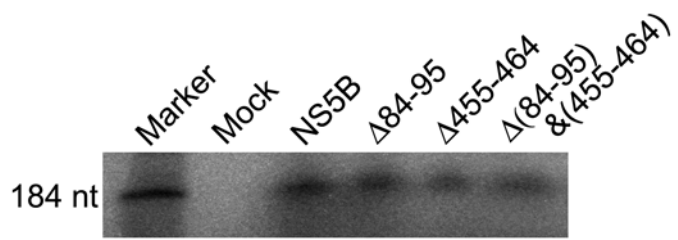

Figure. S3

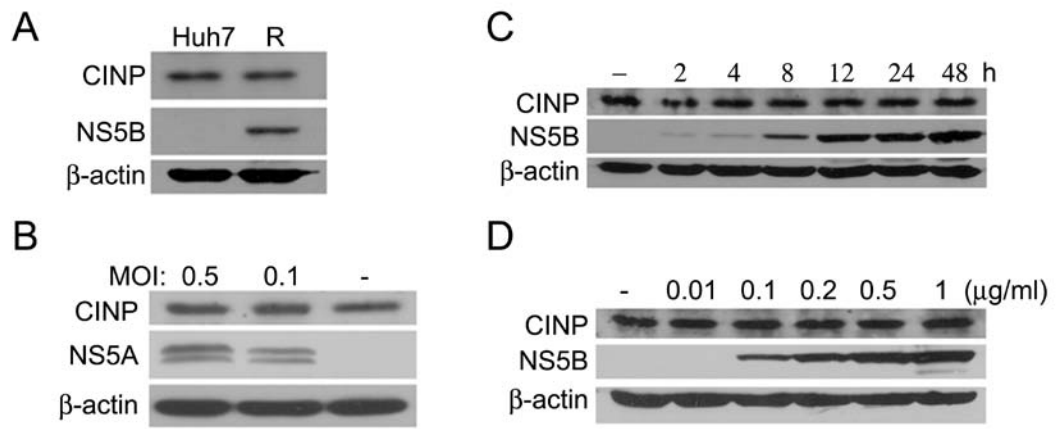

Supplement: supp_M111.225672_jbc.M111.225672-1.pdf [file supp_M111.225672_jbc.M111.225672-1.pdf]
